# Supplementary material for: A Jurkat 76 based triple parameter reporter system to evaluate TCR functions and adoptive T cell strategies
Source: PubMed Central journal article supplement (PMC5915142; doi:10.18632/oncotarget.24807), 2018-04-03
Supplement: oncotarget-09-17608-s001.pdf [file oncotarget-09-17608-s001.pdf]

## A Jurkat 76 based triple parameter reporter system to evaluate TCR functions and adoptive T cell strategies

### SUPPLEMENTARY MATERIALS

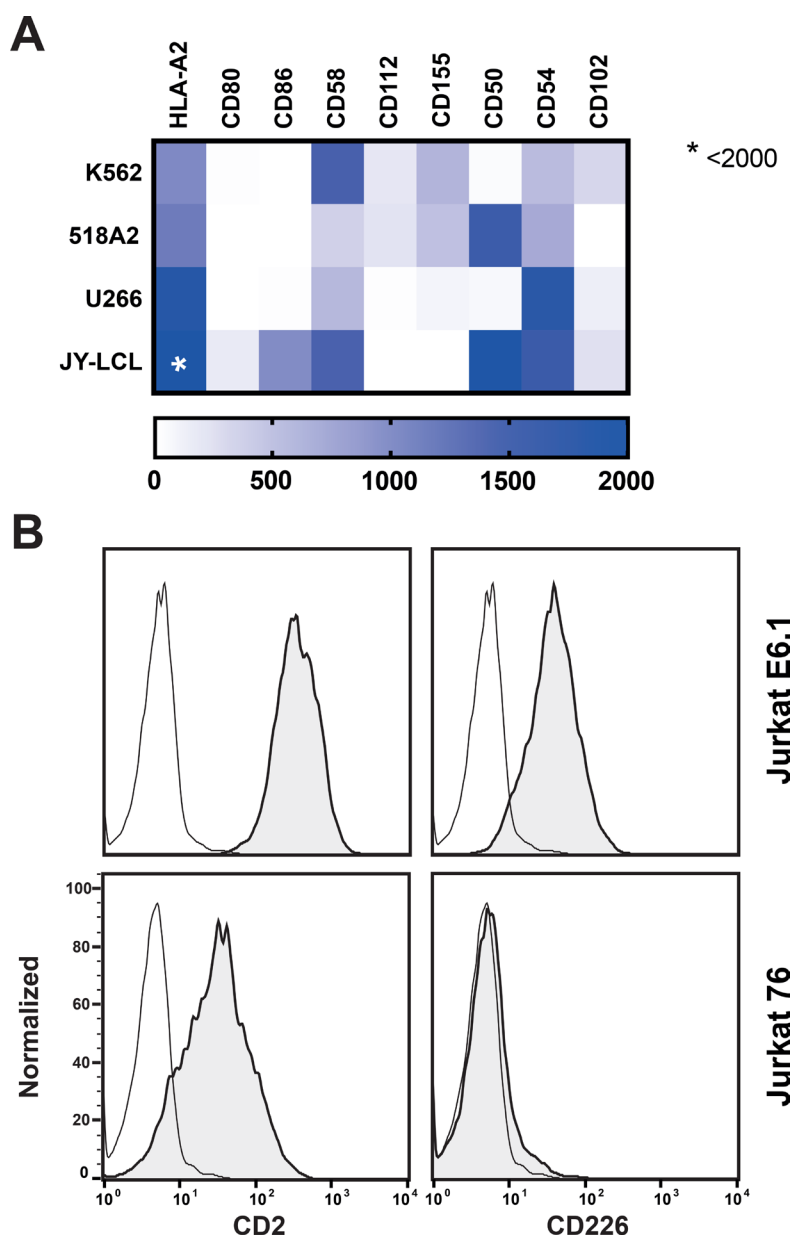

**Supplementary Figure 1: Characterization of tumor cell lines and Jurkat T cell lines.** (A) Expression of costimulatory and adhesion molecules was measured by flow cytometry and geometric mean fluorescent intensity (gMFI) is shown in the form of a heatmap. (B) The two Jurkat T cell lines JE6.1 and J76 were analyzed for their expression of the adhesion molecules CD2 and CD226.
